# Supplementary material for: Differential and Cultivar-Dependent Antioxidant Response of Whole and Fresh-Cut Carrots of Different Root Colors to Postharvest UV-C Radiation
Source: MDPI journal article supplement (doi:10.3390/plants12061297), 2023-03-13
Supplement: s1 [file s1]

**Supplementary Table S1.** Root concentration of mayor anthocyanin glycosides in the purple-rooted cultivars Purplesnax and INTA44

| Anthocyanin pigment                                    | Abbreviation | Retention time (min) | Purplesnax             |            | INTA44                 |            |
|--------------------------------------------------------|--------------|----------------------|------------------------|------------|------------------------|------------|
|                                                        |              |                      | mg kg <sup>-1</sup> fw | % of total | mg kg <sup>-1</sup> fw | % of total |
| Cy-3-(2''-xylose-6-glucose-galactoside)                | Cy3XGG       | 13.7                 | 8.2 ± 2.0 <sup>§</sup> | 1.8        | 0.3 ± 0.2              | 1.0        |
| Cy-3-(2''-xylose-galactoside)                          | Cy3XG        | 14.3                 | 4.3 ± 2.2              | 0.9        | 0.6 ± 0.3              | 2.0        |
| Cy-3-(2''-xylose-6''-sinapoyl-glucose-galactoside)     | Cy3XSGG      | 14.5                 | 20.4 ± 13.6            | 4.4        | 16.4 ± 5.1             | 54.5       |
| Cy-3-(2''-xylose-6''-feruloyl-glucose-galactoside)     | Cy3XFGG      | 15.0                 | 409.2 ± 73.6           | 88         | 12.4 ± 2.1             | 41.2       |
| Cy-3-(2''-xylose-6''-(4-coumuroyl)glucose-galactoside) | Cy3XCGG      | 15.4                 | 19.9 ± 3.7             | 4.3        | 0.4 ± 0.2              | 1.3        |
| Total                                                  |              |                      | 465.0 ± 85.8           | 100        | 30.1 ± 6.6             | 100        |

<sup>§</sup> Concentration of cyanidin glycosides expressed on the basis of cyanidin equivalents ± std. err.

**Supplementary Table S2.** Edaphic characteristics of the carrot growing site

| Edaphic parameter                            | Value (interpretation) |
|----------------------------------------------|------------------------|
| pH                                           | 7.5                    |
| Salinity (dS/m)                              | 1.8 (not saline)       |
| Total Nitrogen (N) (mg/kg)                   | 1050 (high)            |
| Organic matter (%)                           | 5.6                    |
| Available phosphorus (P) (mg/kg)             | 2.7                    |
| Exchangeable potassium (K) (mg/kg)           | 205                    |
| C/N ratio                                    | 8.6                    |
| Texture                                      | Silty loam             |
| Sedimentation volume (cm <sup>3</sup> /100g) | 112                    |

Soil analyses were performed at the Laboratory of Edaphology, Faculty of Agricultural Sciences, National University of Cuyo, Mendoza, Argentina.
